# Supplementary material
Source: PubMed Central journal article supplement (PMC3957864)
Supplement: AAC.00741-13_zac003142684so1.pdf [file AAC.00741-13_zac003142684so1.pdf]

**SUPPLEMENTARY FIGURE S1a-e.** Results from time-kill experiments for VIM-producing *Klebsiella pneumoniae* strain VIM-KP T14789. Each point represents the mean value of three experiments.

(a) Aztreonam combinations

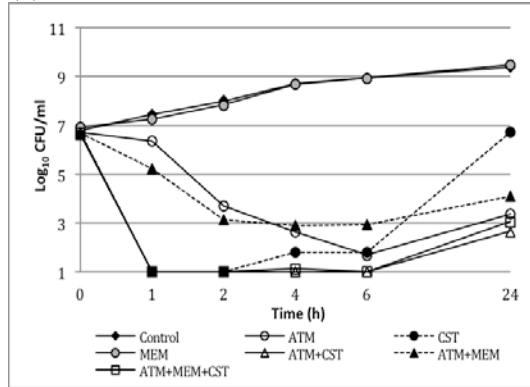

(b) Fosfomycin combinations

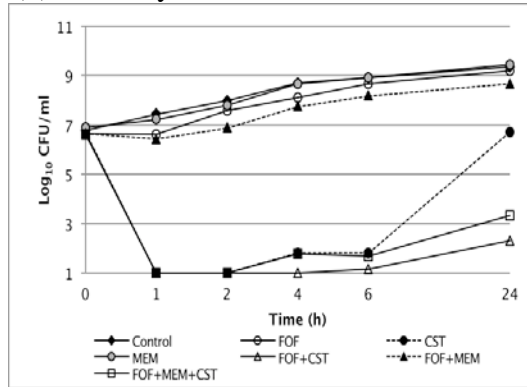

(c) Rifampin combinations

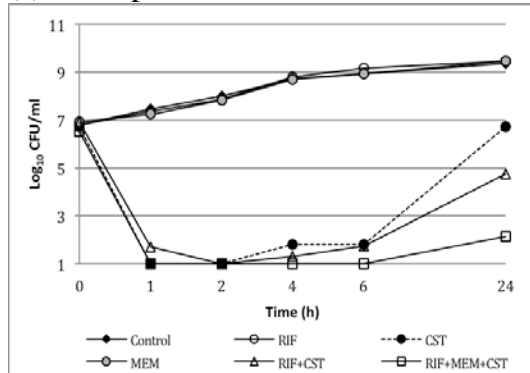

(d) Meropenem combinations

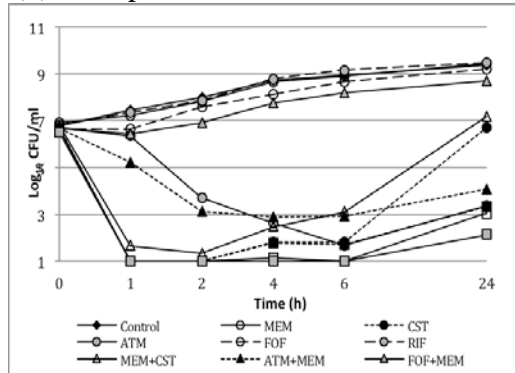

(e) Other combinations

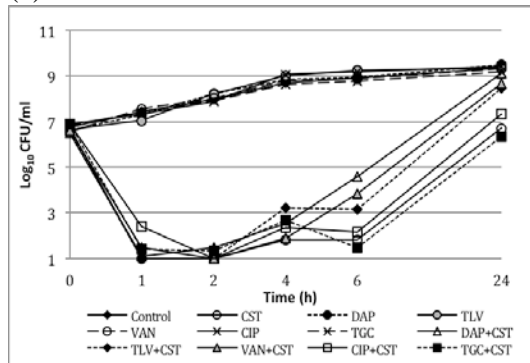

ATM, aztreonam; CST, colistin; MEM, meropenem; FOF, fosfomycin; RIF, rifampin; DAP, daptomycin; VAN, vancomycin; TLV, telavancin; CIP, ciprofloxacin; TGC, tigecycline.

**SUPPLEMENTARY FIGURE S2a-e.** Results from time-kill experiments for VIM-producing *Klebsiella pneumoniae* strain VIM-KP ÖN-2211. Each point represents the mean value of three experiments.

(a) Aztreonam combinations

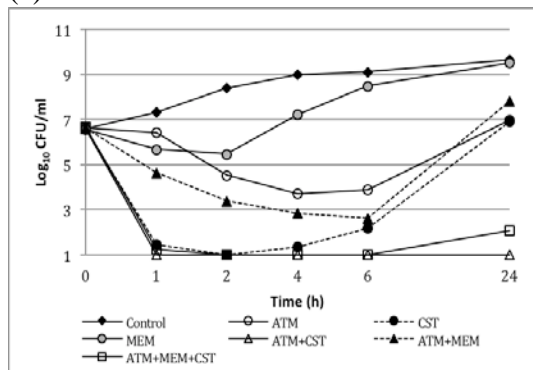

(b) Fosfomycin combinations

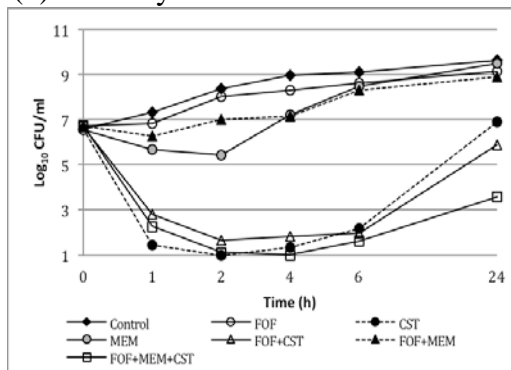

(c) Rifampin combinations

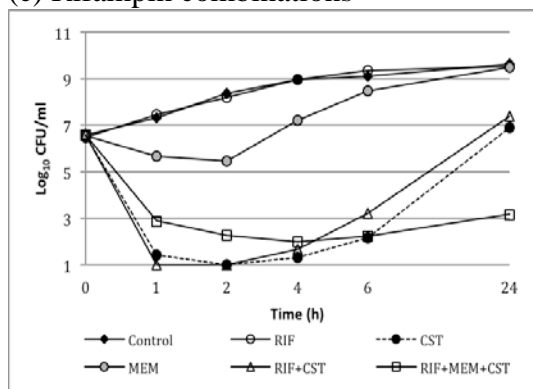

(d) Meropenem combinations

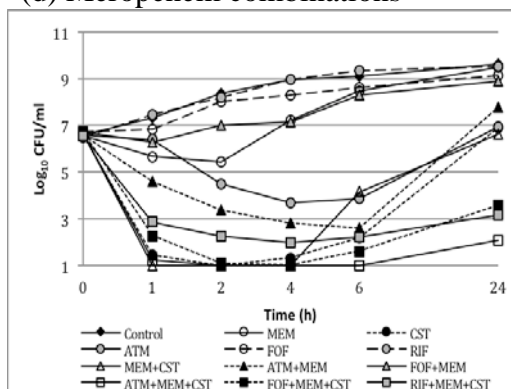

(e) Other combinations

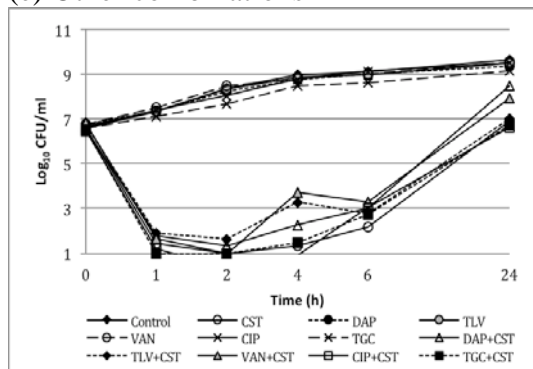

ATM, aztreonam; CST, colistin; MEM, meropenem; FOF, fosfomycin; RIF, rifampin; DAP, daptomycin; VAN, vancomycin; TLV, telavancin; CIP, ciprofloxacin; TGC, tigecycline.

**SUPPLEMENTARY FIGURE S3a-d.** Results from time-kill experiments for NDM-producing *Klebsiella pneumoniae* strain NDM-KP IR8. Each point represents the mean value of two experiments.

(a) Aztreonam combinations

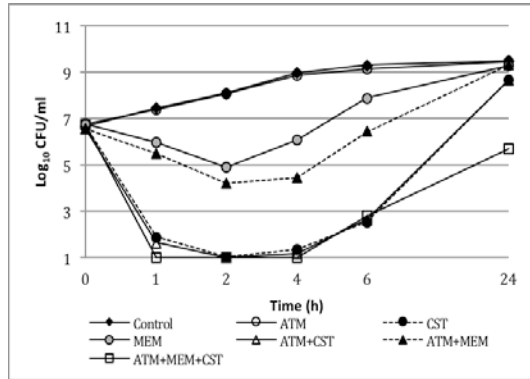

(b) Fosfomycin combinations

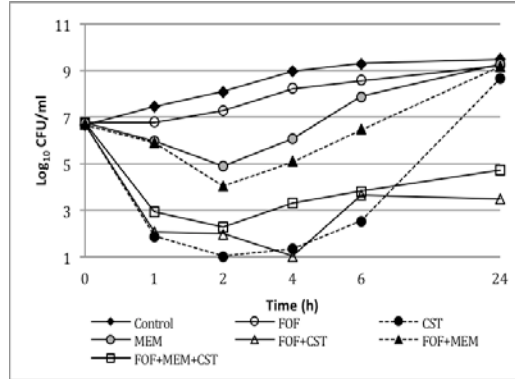

(c) Rifampin combinations

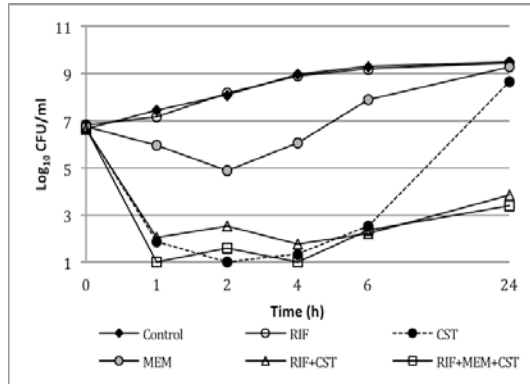

(d) Meropenem combinations

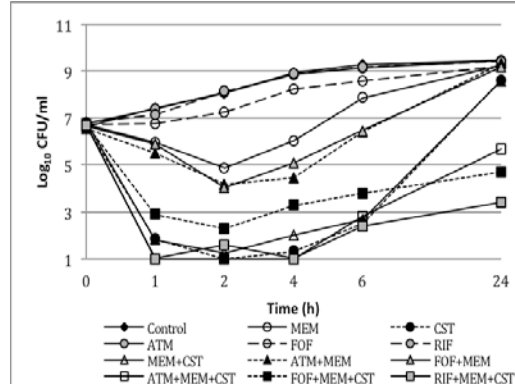

ATM, aztreonam; CST, colistin; MEM, meropenem; FOF, fosfomycin; RIF, rifampin.

**SUPPLEMENTARY FIGURE S4a-d.** Results from time-kill experiments for NDM-producing *Klebsiella pneumoniae* strain NDM-KP IR62E. Each point represents the mean value of two experiments.

(a) Aztreonam combinations

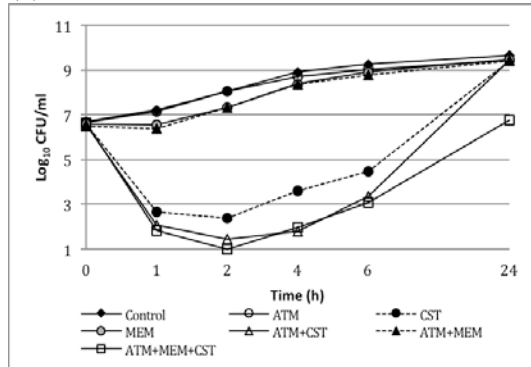

(b) Fosfomycin combinations

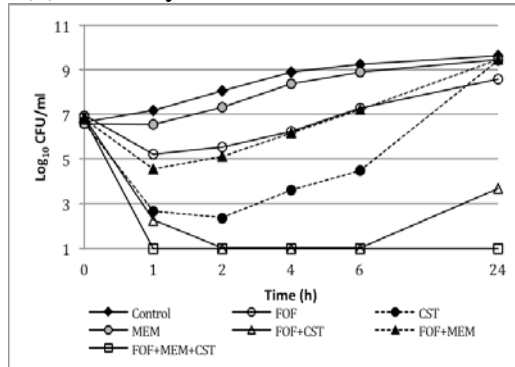

(c) Rifampin combinations

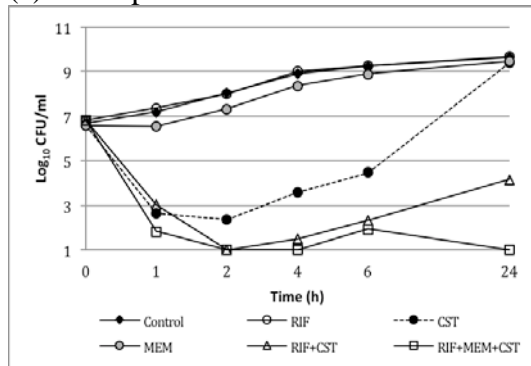

(d) Meropenem combinations

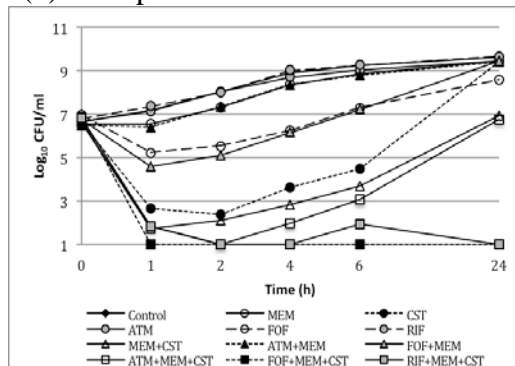

ATM, aztreonam; CST, colistin; MEM, meropenem; FOF, fosfomycin; RIF, rifampin.
